# Supplementary material for: A folate receptor-targeted lipoplex delivering interleukin-15 gene for colon cancer immunotherapy
Source: PubMed Central journal article supplement (PMC5239545; doi:10.18632/oncotarget.10537), 2016-07-11
Supplement: oncotarget-07-52207-s001.pdf [file oncotarget-07-52207-s001.pdf]

## A folate receptor-targeted lipoplex delivering interleukin-15 gene for colon cancer immunotherapy

### SUPPLEMENTARY FIGURES

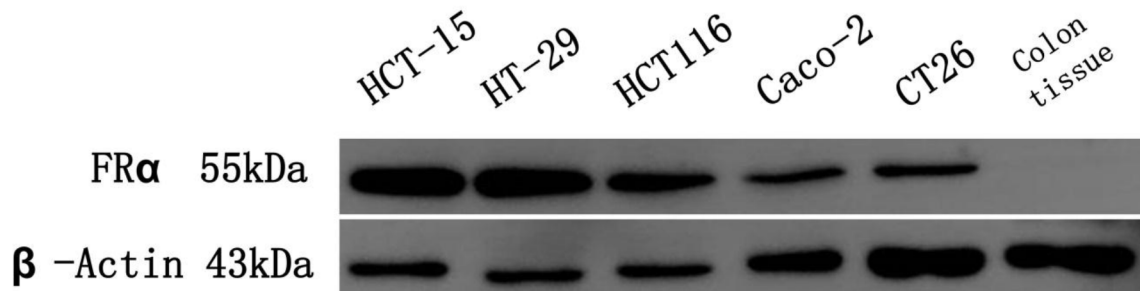

**Supplementary Figure S1: Expression of folate receptor  $\alpha$  (FR $\alpha$ ) in colon cancer cell lines and normal tissue.** HCT-15, HT-29, HCT 116 and Caco-2 cell lines from human colorectal adenocarcinoma, CT26 cell line from BALB/c mouse colon carcinoma, and colon tissue from BALB/c mouse. Anti-FR $\alpha$  antibody (LSB5727) was provided from LifeSpan Biosciences (Seattle, WA, US).  $\beta$ -Actin (sc-69879) was purchased from Santa Cruz Biotechnology, Inc. (Dallas, TX, US).

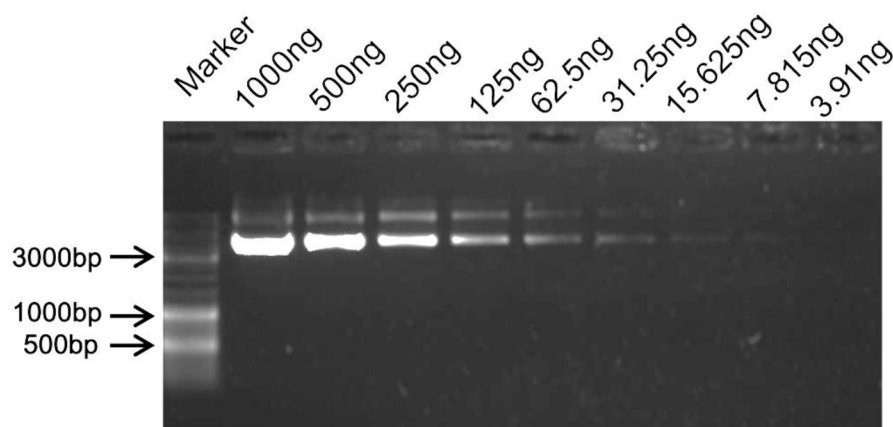

**Supplementary Figure S2: The sensitivity test of agarose gel electrophoresis.** The agarose gel electrophoresis method used in this study is sensitive enough to detect the DNA in nanogram grade (<7.815ng).

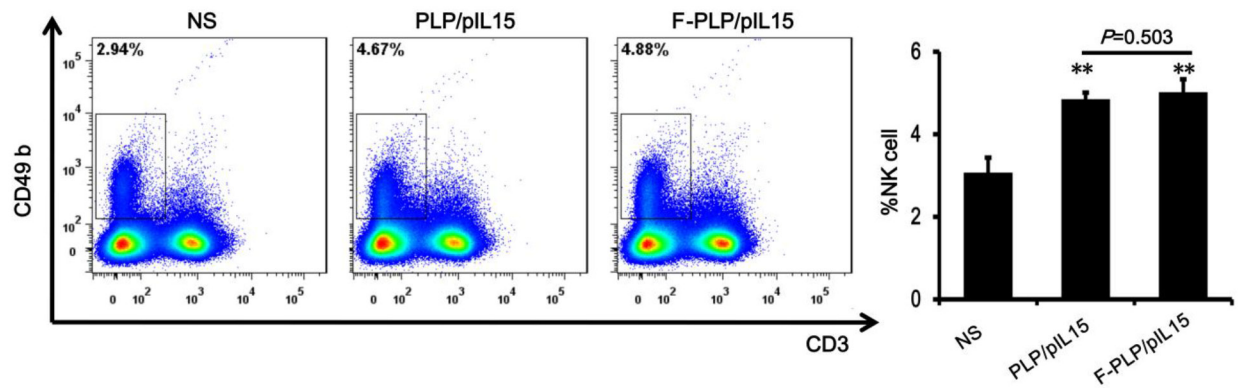

**Supplementary Figure S3: NK proliferation mediated by lipoplexes.** Compared with that in NS mice (3.07%), the rates of NK cells in both PLP/pIL15(4.84%) and F-PLP/pIL15 (5.01%)-treated mice were remarkably raised (\*\* $P < 0.01$ , versus NS, Mean  $\pm$  SD, n = 3). However, F-PLP/pIL15 treatment didn't show significant advantage over PLP/pIL15 treatment ( $P=0.503$ , Mean  $\pm$  SD, n = 3).
